# Supplementary material for: Stool sampling and DNA isolation kits affect DNA quality and bacterial composition following 16S rRNA gene sequencing using MiSeq Illumina platform
Source: PubMed Central journal article supplement (PMC6761292; doi:10.1038/s41598-019-49520-3), 2019-09-25
Supplement: 41598_2019_49520_MOESM1_ESM.pdf [file 41598_2019_49520_MOESM1_ESM.pdf]

## Title page

Stool sampling and DNA isolation kits affect DNA quality and bacterial composition following 16S rRNA gene sequencing using MiSeq Illumina platform

Short title: Systematic assessment of stool sampling and DNA isolation kits.

Petra Videnska<sup>1</sup>, Kristyna Smerkova<sup>1</sup>, Barbora Zwinsova<sup>1</sup>, Vlad Popovici<sup>1</sup>, Lenka Micenkova<sup>1</sup>, Karel Sedlar<sup>2</sup>, Eva Budinska<sup>1\*</sup>

<sup>1</sup>Research Centre for Toxic Compounds in the Environment, Masaryk University, Kamenice 5, 625 00 Brno, Czech Republic

<sup>2</sup>Department of Biomedical Engineering, Brno University of Technology, Technická 12, Brno, Czech Republic

[videnska@recetox.muni.cz](mailto:videnska@recetox.muni.cz)

[k.smerkova@gmail.com](mailto:k.smerkova@gmail.com)

[zwinsova@recetox.muni.cz](mailto:zwinsova@recetox.muni.cz)

[popovici@recetox.muni.cz](mailto:popovici@recetox.muni.cz)

[micenkova@recetox.muni.cz](mailto:micenkova@recetox.muni.cz)

[sedlar@feec.vutbr.cz](mailto:sedlar@feec.vutbr.cz)

[budinska@recetox.muni.cz](mailto:budinska@recetox.muni.cz)

\*Corresponding author

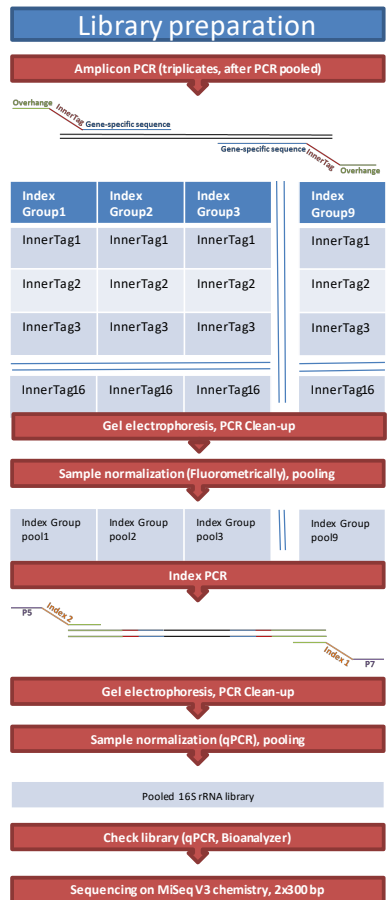

Supplementary figure 1:  
Workflow diagram of library preparation.
